# Supplementary material for: Benefits of newborn screening and hematopoietic cell transplant in infantile Krabbe disease
Source: PubMed Central journal article supplement — Blood Adv. 2022 May 9;6(9):2947–56. doi: 10.1182/bloodadvances.2021006094 (PMC9092415; doi:10.1182/bloodadvances.2021006094), 2022-05-09
Supplement: advancesADV2021006094-suppl1.pdf [file advancesADV2021006094-suppl1.pdf]

**Supplemental Table 1. Clinical results at most recent follow-up.**

|                                                             | <b>Patient (current age in months)</b>                                                     |                                                                                             |                                                                                       |                                                                                      |                                                                                         |                                                              |
|-------------------------------------------------------------|--------------------------------------------------------------------------------------------|---------------------------------------------------------------------------------------------|---------------------------------------------------------------------------------------|--------------------------------------------------------------------------------------|-----------------------------------------------------------------------------------------|--------------------------------------------------------------|
|                                                             | <b>1</b>                                                                                   | <b>2</b>                                                                                    | <b>3</b>                                                                              | <b>4</b>                                                                             | <b>5</b>                                                                                | <b>6</b>                                                     |
| <b>Current age/age at most recent follow-up (in months)</b> | <b>58/53</b>                                                                               | <b>57/52</b>                                                                                | <b>52/44</b>                                                                          | <b>43/45</b>                                                                         | <b>36/35</b>                                                                            | <b>30/24</b>                                                 |
| <b>Height, weight, head circumference (in percentiles)</b>  | < 1%, < 1%, 76%                                                                            | < 1%, < 1%, 3%                                                                              | 67%, 97%, 87%<br>(HC at 29mo)                                                         | 10%, 40%, 50%                                                                        | 3%, 10%, 99%                                                                            | 1%, 2%                                                       |
| <b>Method of Nutrition</b>                                  | By mouth; G-tube supplemental feeds                                                        | Primarily G-tube, purees by mouth                                                           | By mouth                                                                              | By mouth                                                                             | By mouth; supplemental G-tube                                                           | By mouth                                                     |
| <b>Fine motor</b>                                           | Drinks from cup; Self feeds crackers (pincer); Stacks 5 blocks; Scribbles; Plays on tablet | Drinks from cup; Holds toys with both hands & puts into container/take out; Plays on tablet | Drinks from cup; Self feeds: crackers (pincer) & utensils; Scribbles, Plays on tablet | Drinks from cup; Self feeds crackers (pincer) & utensils; Scribbles; Plays on tablet | Drinks from cup; Self feeds crackers (pincer); Stacks 2 blocks; Scribbles; Turns pages; | Waving bye; Reaches & holds toys with both hands; self-feeds |
| <b>Speech/Language</b>                                      | Follows 2-3 step directions, learning colors; 1-2-words phrases, signs, ACC;               | Approximates words; follows commands; nods & gestures;                                      | Speaking 2-3 word sentences; uses 75 signs                                            | Uses signs & gestures; limited words. Strong receptive, ACC                          | 3 verbal words plus several signs; follows commands;                                    | Saying several words, pointing to body parts                 |
| <b>Ambulation</b>                                           | Wheelchair; limited walking with gait-trainer;                                             | Wheelchair;                                                                                 | Self -propel wheelchair; Ride tricycle; Sits unsupported                              | Limited walking with gait-trainer; Sits unsupported; Crawling                        | Self -propel wheelchair; Crawls, but not pull up to stand                               | Walking independently, climbing                              |
| <b>Tone</b>                                                 | Central hypotonia; UE & LE hypertonia                                                      | Central hypotonia; LE hypertonia                                                            | Mild central & UE hypotonia; LE hypertonia                                            | Central hypotonia; LE hypertonia                                                     | Low tone in trunk, increased in legs                                                    | Increased tone LE, no clonus                                 |

|                              |                      |                                                 |                      |                                       |        |    |
|------------------------------|----------------------|-------------------------------------------------|----------------------|---------------------------------------|--------|----|
| <b>Spasticity management</b> | Baclofen, braces, PT | Baclofen, braces, PT, surgery*, botulinum toxin | Baclofen, PT, braces | Baclofen, botulinum toxin, braces, PT | Braces | PT |
|------------------------------|----------------------|-------------------------------------------------|----------------------|---------------------------------------|--------|----|

GALC, galactocerebrosidase; G-tube, gastrostomy tube; AAC, augmentative and alternative communication; LE, lower extremities; UE, upper extremities; PT, physical therapy. \*Patient underwent bilateral intertrochanteric ostomy and hip adductor lengthening.

**Supplemental Table 2. Neurologic Testing Results Before and After Transplant.**

| Study                               | Time                         | Patient No.              |                          |          |                               |                          |                       |
|-------------------------------------|------------------------------|--------------------------|--------------------------|----------|-------------------------------|--------------------------|-----------------------|
|                                     |                              | 1                        | 2                        | 3        | 4                             | 5                        | 6                     |
| Psychosine<br>in nmol/L<br>(normal) | Pre-HCT                      | 24 *                     | 61 *                     | 56       | 73                            | 38                       | 35                    |
|                                     | 6 months                     | ND                       | 21 <sup>a</sup>          | 8.6      | 11                            | 22                       | ND                    |
|                                     | 1-year                       | 12 <sup>a</sup>          | 17 <sup>a</sup>          | 12       | 19                            | 13.2 *                   | 3.6                   |
|                                     | 2-year                       | 9.4                      | ND                       | 10       | 15                            | 15.5 *                   | 47 pmol/g             |
|                                     | Most recent<br>(age, months) | ND                       | ND                       | 3.7 (41) | 16.2 (32)                     | 9.8 (34)                 | NA                    |
| MRI                                 | Pre-HCT                      | Abnormal                 | Normal                   | Abnormal | Normal                        | Normal                   | Abnormal              |
|                                     | 6 months                     | Abnormal                 | Normal                   | Abnormal | Abnormal                      | Abnormal                 | Abnormal              |
|                                     | 1-year                       | Abnormal                 | Abnormal                 | Abnormal | Abnormal                      | Abnormal                 | Abnormal              |
|                                     | 2-year                       | Abnormal                 | Abnormal                 | Abnormal | Abnormal                      | Abnormal                 | Abnormal but improved |
|                                     | Most recent<br>(age, months) | Abnormal, stable<br>(53) | Abnormal,<br>stable (27) | ND       | Abnormal but<br>improved (35) | Abnormal,<br>stable (32) | ND                    |
| VEP                                 | Pre-HCT                      | Abnormal                 | Abnormal                 | Normal   | Normal                        | Normal                   | ND                    |
|                                     | 6 months                     | Normal                   | Abnormal                 | Normal   | Normal                        | Normal                   | ND                    |
|                                     | 1-year                       | Mixed                    | Abnormal<br>(Sedated)    | Normal   | Normal                        | Normal                   | ND                    |
|                                     | 2-year                       | Normal                   | ND                       | Normal   | ND                            | ND                       | ND                    |
|                                     | Most recent<br>(age, months) | Normal (36)              | ND                       | ND       | Borderline (36) <sup>+</sup>  | Abnormal (32)            | ND                    |

|                         |                           |                |          |                |                |               |                |
|-------------------------|---------------------------|----------------|----------|----------------|----------------|---------------|----------------|
| <b>EEG</b>              | Pre-HCT                   | Excessive ESTs | Normal   | Excessive ESTs | Excessive ESTs | Normal        | Excessive ESTs |
|                         | 6 months                  | Sedated        | Normal   | Normal         | ND             | Normal        | ND             |
|                         | 1-year                    | Normal         | Sedated  | Normal         | ND             | Normal        | ND             |
|                         | 2-year                    | Slowing        | Slowing  | Normal         | ND             | Normal        | ND             |
|                         | Most recent (age, months) | Slowing (53)   | ND       | ND             | ND             | Normal (32)   | ND             |
| <b>BAER<sup>c</sup></b> | Pre-HCT                   | Abnormal       | Abnormal | Abnormal       | Abnormal       | Abnormal      | ND             |
|                         | 6 months                  | Abnormal       | Normal   | Abnormal       | Abnormal       | ND            | ND             |
|                         | 1-year                    | Abnormal       | Abnormal | Abnormal       | ND             | ND            | ND             |
|                         | 2-year <sup>±</sup>       | Abnormal       | ND       | Abnormal       | Normal (36)    | NA            | NA             |
| <b>NCS</b>              | Pre-HCT                   | Abnormal       | Abnormal | Abnormal       | Abnormal       | Abnormal      | ND             |
|                         | 6 months                  | ND             | Abnormal | Abnormal       | ND             | Abnormal      | ND             |
|                         | 1-year                    | Abnormal       | Abnormal | Abnormal       | Abnormal       | Abnormal      | ND             |
|                         | 2-year                    | Abnormal       | Abnormal | Abnormal       | ND             | ND            | ND             |
|                         | Most recent (age, months) | Abnormal (36)  | ND       | ND             | ND             | Abnormal (32) | ND             |

HCT, hematopoietic cell transplant; ND, not done; NA, not applicable; MRI, magnetic resonance imaging; VEP, visual evoked potentials; EEG, electroencephalogram; ESTs, excessive sharp transients BAER, brainstem evoked potential responses; NCS, nerve conduction studies; \*Psychosine normal values <2 nmol/L measured on dried blood spot. All other measurements performed on whole blood samples (normal <10 nmol/L). <sup>±</sup>Normal latencies but reduced amplitudes noted; <sup>±</sup>BAERs were not performed beyond 2-years in this cohort.
